# Supplementary material
Source: PubMed Central journal article supplement (PMC2918961)
Supplement: supp_76_16_5432__1.pdf [file supp_76_16_5432__1.pdf]

## Supplementary material

### **Meta-transcriptomic analysis of the response of river biofilms to pharmaceutical products using anonymous DNA microarrays**

Etienne Yergeau, John R. Lawrence, Marley J. Waiser, Darren R. Korber, and Charles

W. Greer

**Supplementary Table S1:** Primers designed and used in this study.

| Probe # | Gene                                                  | name                   | Sequence 5'-3'                                      |
|---------|-------------------------------------------------------|------------------------|-----------------------------------------------------|
| 13925   | Chaperone protein DnaK                                | dnaK-1F<br>dnaK-1R     | AGCCGAACGACAAGGTGCAAT<br>ACTTGCCGTACATCATGCCGGT     |
| 8047    | ppGpp synthetase I                                    | ppGpp-1F<br>ppGpp-1R   | CGACTCCCAGGATGGGGGCA<br>CCATGCACACCGTCGCCGAA        |
| 14393   | tonB-dependent receptor                               | tonB-2F<br>tonB-2R     | GCCGGGGCAGCAGAATACAGG<br>CAGTGCTGCCTGCGCTGGTT       |
| 5271    | photosystem I reaction center subunit X               | psrcX-2F<br>psrcX-2R   | GCGCAGATCAATCCCAGGGCA<br>GTGACACCGCCGACAGCCAA       |
| 14137   | UDP-N-acetylglucosamine 1-<br>carboxyvinyltransferase | NAGCVT-2F<br>NAGCVT-2R | GCGAAAATGGCACCAGCGAGC<br>CCTGCCCATGGCGGGCAA         |
| 2027    | DNA-directed DNA polymerase B                         | DNApol-1F<br>DNApol-1R | CGCCCCAAGTCTACACAAACCGT<br>ACGCTAGGGTACATGGATGCAACA |
| 19275   | acetyl-CoA carboxylase                                | ACoAC-2F<br>ACoAC-1R   | GCGGCGCAAGTGTTTCATTCGG<br>ACGGCTTGTTGGGGTCGCTG      |

**Supplementary Table S2:** Most significantly affected probes by the sulfamethoxazole treatment for the Wascana Creek

| Probe                    | CAI   | Gene                                                                                   | Organism                                      | Phylum                     | E-value  | COG |
|--------------------------|-------|----------------------------------------------------------------------------------------|-----------------------------------------------|----------------------------|----------|-----|
| <i>Positive response</i> |       |                                                                                        |                                               |                            |          |     |
| 16111                    | 5.28  | hypothetical protein                                                                   | <i>Monosiga brevicollis</i> MX1               | <i>Choanozoa</i>           | 1.00E-13 |     |
| 14393                    | 4.78  | <b>TonB-dependent receptor</b>                                                         | <i>Chitinophaga pinensis</i> DSM 2588         | <i>Bacteroidetes</i>       | 6.00E-22 |     |
| 14137                    | 4.76  | <b>UDP-N-acetylglucosamine 1-carboxyvinyltransferase</b>                               | <i>Magnetospirillum gryphiswaldense</i> MSR-1 | <i>Alphaproteobacteria</i> | 6.00E-42 | M   |
| 5565                     | 4.54  | hypothetical protein Ssed_2383                                                         | <i>Shewanella sediminis</i> HAW-EB3           | <i>Gammaproteobacteria</i> | 8.00E-05 |     |
| 5587                     | 4.00  | RNA binding S1                                                                         | <i>Cylindrospermopsis raciborskii</i> CS-505  | <i>Cyanobacteria</i>       | 1.00E-18 | K   |
| 7607                     | 3.86  | iron-sulfur cluster assembly protein                                                   | <i>Acaryochloris marina</i> MBIC11017         | <i>Cyanobacteria</i>       | 4.00E-17 | S   |
| 5589                     | 3.68  | serine/threonine protein kinase                                                        | <i>Cyanothece</i> sp. PCC 7425                | <i>Cyanobacteria</i>       | 1.00E-35 | TKL |
| 11677                    | 3.41  | serine hydroxymethyltransferase                                                        | <i>Synechococcus elongatus</i> PCC 7942       | <i>Cyanobacteria</i>       | 1.00E-17 | E   |
| 5321                     | 3.37  | death-on-curing family protein                                                         | <i>Denitrovibrio acetiphilus</i> DSM 12809    | <i>Deferribacteres</i>     | 8.00E-50 | R   |
| 15643                    | 3.19  | trimethylamine dehydrogenase                                                           | <i>Octadecabacter antarcticus</i> 238         | <i>Alphaproteobacteria</i> | 1.00E-38 | C   |
| 847                      | 3.16  | b-glycosyltransferase                                                                  | <i>Cytophaga hutchinsonii</i> ATCC 33406      | <i>Bacteroidetes</i>       | 1.00E-25 | M   |
| 13717                    | 2.99  | hypothetical membrane protein                                                          | <i>Gemmatimonas aurantiaca</i> T-27           | <i>Gemmatimonadetes</i>    | 3.00E-15 |     |
| 14385                    | 2.92  | glycosyl transferase, group 1                                                          | <i>Acaryochloris marina</i> MBIC11017         | <i>Cyanobacteria</i>       | 8.00E-50 | M   |
| 12455                    | 2.92  | Tetratricopeptide repeat protein                                                       | <i>Planctomyces maris</i> DSM 8797            | <i>Planctomycetes</i>      | 3.00E-08 |     |
| 1849                     | 2.83  | hybrid sensory kinase                                                                  | <i>Lyngbya</i> sp. PCC 8106                   | <i>Cyanobacteria</i>       | 2.00E-15 | T   |
| 3255                     | 2.80  | transporter                                                                            | <i>Rhodopirellula baltica</i> SH 1            | <i>Planctomycetes</i>      | 3.00E-07 |     |
| 8271                     | 2.78  | protein serine/threonine phosphatases                                                  | <i>Trichodesmium erythraeum</i> IMS101        | <i>Cyanobacteria</i>       | 1.00E-20 | T   |
| 18967                    | 2.75  | cytosolic tRNA-Ala synthetase, putative                                                | <i>Perkinsus marinus</i> ATCC 50983           | <i>Dinoflagellata</i>      | 8.00E-06 | J   |
| 16587                    | 2.73  | alpha/beta hydrolase fold protein                                                      | <i>Clostridium carboxidivorans</i> P7         | <i>Firmicutes</i>          | 2.00E-07 | I   |
| 11445                    | 2.68  | thiamine biosynthesis protein ThiS                                                     | <i>Solibacter usitatus</i> Ellin6076          | <i>Acidobacteria</i>       | 2.00E-12 | H   |
| 10047                    | 2.62  | hypothetical protein L8106_19046                                                       | <i>Lyngbya</i> sp. PCC 8106                   | <i>Cyanobacteria</i>       | 1.00E-11 |     |
| 1155                     | 2.59  | diaminopimelate epimerase                                                              | <i>uncultured methanogenic archaeon</i> RC-I  | <i>Euryarcheota</i>        | 4.00E-05 | E   |
| <i>Negative response</i> |       |                                                                                        |                                               |                            |          |     |
| 5263                     | -3.95 | cell shape determining protein MreB                                                    | <i>Acidobacterium capsulatum</i> ATCC 51196   | <i>Acidobacteria</i>       | 3.00E-14 | D   |
| 18133                    | -3.89 | glycosyl transferase group 1                                                           | <i>Spirosoma linguale</i> DSM 74              | <i>Bacteroidetes</i>       | 3.00E-09 | M   |
| 2027                     | -3.75 | <b>DNA-directed DNA polymerase B</b>                                                   | <i>Cyanothece</i> sp. PCC 7424                | <i>Cyanobacteria</i>       | 2.00E-12 | L   |
| 19275                    | -3.35 | <b>acetyl-CoA carboxylase, carboxyltransferase component (subunits alpha and beta)</b> | <i>Halogeometricum borinquense</i> DSM 11551  | <i>Euryarcheota</i>        | 8.00E-40 | I   |
| 1683                     | -3.31 | hemolysin A                                                                            | <i>Methylobacterium nodulans</i> ORS 2060     | <i>Alphaproteobacteria</i> | 2.00E-16 | Q   |

| Probe | CA1   | Gene                                                              | Organism                                    | Phylum                     | E-value  | COG |
|-------|-------|-------------------------------------------------------------------|---------------------------------------------|----------------------------|----------|-----|
| 19299 | -3.27 | hypothetical protein VspiD_21975                                  | <i>Verrucomicrobium spinosum</i> DSM 4136   | <i>Verrucomicrobia</i>     | 2.00E-06 |     |
| 12233 | -3.27 | protein-L-isoaspartate(D-aspartate) O-methyltransferase           | <i>Rhodoferrax ferrireducens</i> T118       | <i>Betaproteobacteria</i>  | 8.00E-19 | O   |
| 18099 | -3.22 | flagellar synthesis regulator FleN                                | <i>Pseudomonas aeruginosa</i> PAO1          | <i>Gammaproteobacteria</i> | 3.00E-32 | D   |
| 19357 | -3.15 | hypothetical protein M446_1504                                    | <i>Methylobacterium</i> sp. 4-46            | <i>Alphaproteobacteria</i> | 6.00E-16 |     |
| 759   | -3.08 | Hypothetical protein CBG13434                                     | <i>Caenorhabditis briggsae</i>              | <i>Nematoda</i>            | 2.00E-08 |     |
| 11731 | -3.04 | putative methyltransferase                                        | <i>Gemmatimonas aurantiaca</i> T-27         | <i>Gemmatimonadetes</i>    | 3.00E-26 | L   |
| 6171  | -3.01 | short chain enoyl-CoA hydratase / 3-hydroxyacyl-CoA dehydrogenase | <i>Polaromonas</i> sp. JS666                | <i>Betaproteobacteria</i>  | 6.00E-58 | I   |
| 16751 | -2.94 | glutamine amidotransferase                                        | <i>alpha proteobacterium</i> BAL199         | <i>Alphaproteobacteria</i> | 1.00E-14 | F   |
| 18653 | -2.93 | UbiA prenyltransferase                                            | <i>Gallionella ferruginea</i> ES-2          | <i>Betaproteobacteria</i>  | 2.00E-25 | H   |
| 14509 | -2.87 | hypothetical protein PM8797T_03259                                | <i>Planctomyces maris</i> DSM 8797          | <i>Planctomycetes</i>      | 5.00E-18 |     |
| 8775  | -2.82 | Fatty acid/phospholipid synthesis protein PlsX                    | <i>Leptospira biflexa</i> 'Patoc 1 (Paris)' | <i>Spirochaetes</i>        | 8.00E-24 | I   |
| 15591 | -2.81 | glutamine synthetase catalytic region                             | <i>Parvibaculum lavamentivorans</i> DS-1    | <i>Alphaproteobacteria</i> | 2.00E-26 | E   |
| 8893  | -2.76 | Mg2+ transport protein                                            | <i>Nodularia spumigena</i> CCY9414          | <i>Cyanobacteria</i>       | 7.00E-17 | P   |
| 365   | -2.72 | ribosomal protein L11                                             | <i>Geobacter</i> sp. FRC-32                 | <i>Deltaproteobacteria</i> | 3.00E-12 | J   |
| 19763 | -2.61 | pyridine nucleotide-disulphide oxidoreductase                     | <i>Acaryochloris marina</i> MBIC11017       | <i>Cyanobacteria</i>       | 4.00E-30 | C   |
| 13659 | -2.56 | MFS permease                                                      | <i>Agrobacterium vitis</i> S4               | <i>Alphaproteobacteria</i> | 4.00E-19 | G   |
| 8427  | -2.55 | aldehyde Dehydrogenase                                            | <i>Thermobaculum terrenum</i> ATCC BAA-798  | NA                         | 3.00E-16 | C   |
| 19745 | -2.55 | putative membrane protein                                         | <i>Lyngbya</i> sp. PCC 8106                 | <i>Cyanobacteria</i>       | 1.00E-10 |     |
| 8585  | -2.49 | FHA domain containing protein                                     | bacterium Ellin514                          | <i>Verrucomicrobia</i>     | 9.00E-09 | T   |
| 13807 | -2.47 | DNA-directed RNA polymerase, beta subunit                         | <i>Microcoleus chthonoplastes</i> PCC 7420  | <i>Cyanobacteria</i>       | 1.00E-52 | K   |
| 3961  | -2.44 | TPR repeat protein                                                | <i>Beggiatoa</i> sp. PS                     | <i>Gammaproteobacteria</i> | 2.00E-10 | S   |
| 6933  | -2.44 | acetate--CoA ligase                                               | <i>Leptothrix cholodnii</i> SP-6            | <i>Betaproteobacteria</i>  | 6.00E-26 | I   |

Genes in boldface were used to design PCR primers or were depicted in Fig. 2.

COG: C, Energy production and conversion; D, Cell division and chromosome partitioning; E, Amino acid transport and metabolism; F, Nucleotide transport and metabolism; G, Carbohydrate transport and metabolism; H, Coenzyme transport and metabolism; I, Lipid transport and metabolism; J, Translation, ribosomal structure and biogenesis; K, Transcription; L, Replication, recombination and repair; M, Cell envelope biogenesis, outer membrane; O, Posttranslational modification, protein turnover, chaperones; P, Inorganic ion transport and metabolism; Q, Secondary metabolites biosynthesis, transport and catabolism; R, General function prediction only; S, Function unknown; T, Signal transduction; U, Intracellular trafficking, secretion, and vesicular transport; V, Defense mechanisms.

**Supplementary Table S3: Most significantly affected probes by the gemfibrozil treatment for the Wascana Creek**

| Probe                    | CAI   | Gene                                                                                   | Organism                                     | Phylum                     | E-value  | COG |
|--------------------------|-------|----------------------------------------------------------------------------------------|----------------------------------------------|----------------------------|----------|-----|
| <i>Positive response</i> |       |                                                                                        |                                              |                            |          |     |
| 5271                     | -3.70 | <b>photosystem I reaction center subunit X</b>                                         | <i>Synechococcus elongatus</i> PCC 6301      | <i>Cyanobacteria</i>       | 2.00E-07 | C   |
| 5107                     | -3.55 | transaldolase                                                                          | <i>Oligotropha carboxidovorans</i> OM5       | <i>Alphaproteobacteria</i> | 5.00E-27 | G   |
| 19275                    | -3.35 | <b>acetyl-CoA carboxylase, carboxyltransferase component (subunits alpha and beta)</b> | <i>Halogeometricum borinquense</i> DSM 11551 | <i>Euryarcheota</i>        | 8.00E-40 | I   |
| 1683                     | -3.31 | hemolysin A                                                                            | <i>Methylobacterium nodulans</i> ORS 2060    | <i>Alphaproteobacteria</i> | 2.00E-16 | Q   |
| 18099                    | -3.22 | flagellar synthesis regulator FleN                                                     | <i>Pseudomonas aeruginosa</i> PAO1           | <i>Gammaproteobacteria</i> | 3.00E-32 | D   |
| 19357                    | -3.15 | hypothetical protein M446_1504                                                         | <i>Methylobacterium</i> sp. 4-46             | <i>Alphaproteobacteria</i> | 6.00E-16 |     |
| 6171                     | -3.01 | short chain enoyl-CoA hydratase / 3-hydroxyacyl-CoA dehydrogenase                      | <i>Polaromonas</i> sp. JS666                 | <i>Betaproteobacteria</i>  | 6.00E-58 | I   |
| 14509                    | -2.87 | hypothetical protein PM8797T_03259                                                     | <i>Planctomyces maris</i> DSM 8797           | <i>Planctomycetes</i>      | 5.00E-18 |     |
| 8775                     | -2.82 | Fatty acid/phospholipid synthesis protein PlsX                                         | <i>Leptospira biflexa</i> 'Patoc 1 (Paris)'  | <i>Spirochaetes</i>        | 8.00E-24 | I   |
| 15591                    | -2.81 | glutamine synthetase catalytic region                                                  | <i>Parvibaculum lavamentivorans</i> DS-1     | <i>Alphaproteobacteria</i> | 2.00E-26 | E   |
| 8477                     | -2.71 | DNA gyrase, A subunit                                                                  | <i>Methylotenera mobilis</i> JLW8            | <i>Betaproteobacteria</i>  | 4.00E-07 | L   |
| <i>Negative response</i> |       |                                                                                        |                                              |                            |          |     |
| 16111                    | 5.28  | hypothetical protein                                                                   | <i>Monosiga brevicollis</i> MX1              | <i>Choanozoa</i>           | 1.00E-13 |     |
| 14393                    | 4.78  | <b>TonB-dependent receptor</b>                                                         | <i>Chitinophaga pinensis</i> DSM 2588        | <i>Bacteroidetes</i>       | 6.00E-22 |     |
| 605                      | 3.05  | RNA polymerase, sigma-24 subunit, ECF subfamily                                        | <i>Chitinophaga pinensis</i> DSM 2588        | <i>Bacteroidetes</i>       | 7.00E-17 | K   |
| 13717                    | 2.99  | hypothetical membrane protein                                                          | <i>Gemmatimonas aurantiaca</i> T-27          | <i>Gemmatimonadetes</i>    | 3.00E-15 |     |
| 14385                    | 2.92  | glycosyl transferase, group 1                                                          | <i>Acaryochloris marina</i> MBIC11017        | <i>Cyanobacteria</i>       | 8.00E-50 | M   |
| 19439                    | 2.89  | TonB-dependent receptor                                                                | <i>Chitinophaga pinensis</i> DSM 2588        | <i>Bacteroidetes</i>       | 4.00E-16 |     |
| 1849                     | 2.83  | hybrid sensory kinase                                                                  | <i>Lyngbya</i> sp. PCC 8106                  | <i>Cyanobacteria</i>       | 2.00E-15 | T   |
| 661                      | 2.82  | alpha amylase, catalytic domain subfamily, putative                                    | <i>uncultured marine bacterium</i> Ant29B7   | NA                         | 2.00E-20 | G   |

Genes in boldface were used to design PCR primers or were depicted in Fig. 2.

COG: C, Energy production and conversion; D, Cell division and chromosome partitioning; E, Amino acid transport and metabolism; F, Nucleotide transport and metabolism; G, Carbohydrate transport and metabolism; H, Coenzyme transport and metabolism; I, Lipid transport and metabolism; J, Translation, ribosomal structure and biogenesis; K, Transcription; L, Replication, recombination and repair; M, Cell envelope biogenesis, outer membrane; O, Posttranslational modification, protein turnover, chaperones; P, Inorganic ion transport and metabolism; Q, Secondary metabolites biosynthesis, transport and catabolism; R, General function prediction only; S, Function unknown; T, Signal transduction; U, Intracellular trafficking, secretion, and vesicular transport; V, Defense mechanisms.

**Supplementary Table S4: Most significantly affected probes by the erythromycin treatment for the Wascana Creek**

| Probe                    | CA2  | Gene                                                                                                                            | Organism                                  | Phylum                       | E-value  | COG |
|--------------------------|------|---------------------------------------------------------------------------------------------------------------------------------|-------------------------------------------|------------------------------|----------|-----|
| <i>Positive response</i> |      |                                                                                                                                 |                                           |                              |          |     |
| 13925                    | 5.74 | <b>chaperone protein DnaK</b>                                                                                                   | <i>Spirosoma linguale</i> DSM 74          | <i>Bacteroidetes</i>         | 1.00E-07 | O   |
| 5897                     | 4.68 | hypothetical protein CAMRE0001_0799                                                                                             | <i>Campylobacter rectus</i> RM3267        | <i>Epsilonproteobacteria</i> | 4.00E-24 |     |
| 13903                    | 4.13 | reverse transcriptase family protein                                                                                            | <i>Chlorobium chlorochromatii</i> CaD3    | <i>Chlorobi</i>              | 1.00E-21 | L   |
| 13229                    | 3.92 | TonB protein                                                                                                                    | <i>Phenylobacterium zucineum</i> HLK1     | <i>Alphaproteobacteria</i>   | 1.00E-13 |     |
| 17047                    | 3.64 | isoleucyl-tRNA synthetase                                                                                                       | <i>Gordonia bronchialis</i> DSM 43247     | <i>Actinobacteria</i>        | 3.00E-06 | J   |
| 20051                    | 3.45 | Rickettsia 17 kDa surface antigen family                                                                                        | <i>Nitrosococcus oceani</i> AFC27         | <i>Gammaproteobacteria</i>   | 2.00E-12 | S   |
| 5517                     | 3.24 | uncharacterized protein                                                                                                         | uncultured bacterium HF186_75m_14K15      | NA                           | 3.00E-23 |     |
| 13885                    | 3.16 | hypothetical protein Phep_2786                                                                                                  | <i>Pedobacter heparinus</i> DSM 2366      | <i>Bacteroidetes</i>         | 8.00E-05 |     |
| 1911                     | 3.12 | hypothetical protein RB2654_23343                                                                                               | <i>Rhodobacterales bacterium</i> HTCC2654 | <i>Alphaproteobacteria</i>   | 6.00E-22 |     |
| 6183                     | 3.08 | ATP synthase F0, A subunit                                                                                                      | <i>Leptothrix cholodnii</i> SP-6          | <i>Betaproteobacteria</i>    | 2.00E-17 | C   |
| 8241                     | 2.98 | DNA protecting protein DprA                                                                                                     | <i>Variovorax paradoxus</i> S110          | <i>Betaproteobacteria</i>    | 5.00E-13 | LU  |
| 14253                    | 2.93 | VWA domain-containing protein                                                                                                   | <i>Hyphomonas neptunium</i> ATCC 15444    | <i>Alphaproteobacteria</i>   | 2.00E-16 |     |
| 12417                    | 2.86 | Sec-independent protein translocase TatC                                                                                        | <i>Solibacter usitatus</i> Ellin6076      | <i>Acidobacteria</i>         | 1.00E-36 | U   |
| 1077                     | 2.86 | hypothetical protein                                                                                                            | <i>Curvibacter</i> sp.                    | <i>Betaproteobacteria</i>    | 7.00E-10 |     |
| 16407                    | 2.79 | UDP-N-acetylmuramate--alanine<br>ligase/undecaprenyldiphospho-<br>muramoylpentapeptide beta-N-<br>acetylglucosaminyltransferase | <i>Cellulomonas flavigena</i> DSM 20109   | <i>Actinobacteria</i>        | 2.00E-10 | M   |
| 7247                     | 2.77 | hypothetical protein                                                                                                            | <i>Arthrobacter nicotinovorans</i>        | <i>Actinobacteria</i>        | 3.00E-09 |     |
| 16353                    | 2.68 | Type II restriction enzyme, methylase subunit;<br>N6 adenine-specific DNA methyltransferase<br>protein, N12 class               | <i>Synechococcus</i> sp. PCC 7002         | <i>Cyanobacteria</i>         | 9.00E-49 | V   |
| 17657                    | 2.67 | resolvase, N-terminal                                                                                                           | <i>Dechloromonas aromatica</i> RCB        | <i>Betaproteobacteria</i>    | 3.00E-30 | L   |
| 12659                    | 2.67 | DEAD/DEAH box helicase domain protein                                                                                           | <i>Desulfovibrio salexigens</i> DSM 2638  | <i>Deltaproteobacteria</i>   | 3.00E-17 | L   |
| 8047                     | 2.59 | <b>(p)ppGpp synthetase I, SpoT/RelA</b>                                                                                         | <i>Nostoc azollae</i> 0708                | <i>Cyanobacteria</i>         | 3.00E-62 | TK  |
| 13311                    | 2.57 | hypothetical protein all7633                                                                                                    | <i>Nostoc</i> sp. PCC 7120                | <i>Cyanobacteria</i>         | 4.00E-23 |     |
| 13831                    | 2.56 | UmuD protein                                                                                                                    | <i>Desulfovibrio magneticus</i> RS-1      | <i>Deltaproteobacteria</i>   | 6.00E-07 | KT  |
| 17103                    | 2.50 | ribosomal protein L4/L1 family                                                                                                  | <i>Oligotropha carboxidovorans</i> OM5    | <i>Alphaproteobacteria</i>   | 4.00E-40 | J   |
| 8129                     | 2.50 | hypothetical protein HNE_2611                                                                                                   | <i>Hyphomonas neptunium</i> ATCC 15444    | <i>Alphaproteobacteria</i>   | 4.00E-14 |     |
| 8231                     | 2.48 | UDP-glucose 4-epimerase                                                                                                         | <i>Dyadobacter fermentans</i> DSM 18053   | <i>Bacteroidetes</i>         | 7.00E-09 | M   |
| 5921                     | 2.45 | sensor protein                                                                                                                  | <i>Leptothrix cholodnii</i> SP-6          | <i>Betaproteobacteria</i>    | 8.00E-08 | T   |

| Probe                    | CA2   | Gene                                                              | Organism                                        | Phylum                     | E-value  | COG |
|--------------------------|-------|-------------------------------------------------------------------|-------------------------------------------------|----------------------------|----------|-----|
| <i>Negative response</i> |       |                                                                   |                                                 |                            |          |     |
| 5317                     | -5.09 | conserved hypothetical protein                                    | <i>Arthrospira maxima</i> CS-328                | <i>Cyanobacteria</i>       | 5.00E-25 |     |
| 5321                     | -4.13 | death-on-curing family protein                                    | <i>Denitrovibrio acetiphilus</i> DSM 12809      | <i>Deferribacteres</i>     | 8.00E-50 | R   |
| 1707                     | -4.03 | Phosphoglycerate kinase                                           | <i>Cyanothece</i> sp. PCC 7425                  | <i>Cyanobacteria</i>       | 3.00E-14 | G   |
| 5345                     | -4.02 | cysteine desulfurase, SufS subfamily                              | <i>Nostoc azollae</i> 0708                      | <i>Cyanobacteria</i>       | 1.00E-17 | E   |
| 1293                     | -3.58 | Methylated-DNA-(protein)-cysteine S-methyltransferase DNA binding | <i>Kosmotoga olearia</i> TBF 19.5.1             | <i>Thermotogae</i>         | 7.00E-07 | L   |
| 16249                    | -3.56 | hypothetical protein all1772                                      | <i>Nostoc</i> sp. PCC 7120                      | <i>Cyanobacteria</i>       | 8.00E-05 |     |
| 4917                     | -3.19 | protein RecA                                                      | <i>Prevotella veroralis</i> F0319               | <i>Bacteroidetes</i>       | 6.00E-22 | L   |
| 16447                    | -3.17 | hypothetical protein RB2501_13699                                 | <i>Robiginitalea biformata</i> HTCC2501         | <i>Bacteroidetes</i>       | 8.00E-50 |     |
| 14305                    | -3.15 | hypothetical protein Lcho_2013                                    | <i>Leptothrix cholodnii</i> SP-6                | <i>Betaproteobacteria</i>  | 7.00E-07 |     |
| 7495                     | -3.12 | nucleoside recognition domain protein                             | <i>Sphingobacterium spiritivorum</i> ATCC 33300 | <i>Bacteroidetes</i>       | 3.00E-52 | R   |
| 2003                     | -3.12 | Glycerophosphoryl diester phosphodiesterase                       | <i>Cylindrospermopsis raciborskii</i> CS-505    | <i>Cyanobacteria</i>       | 6.00E-26 | C   |
| 6765                     | -3.03 | riboflavin synthase, alpha subunit                                | <i>Synechococcus</i> sp. PCC 7335               | <i>Cyanobacteria</i>       | 9.00E-10 | H   |
| 13905                    | -2.99 | Aldehyde oxidase                                                  | <i>Erythrobacter</i> sp. NAP1                   | <i>Alphaproteobacteria</i> | 3.00E-35 | C   |
| 11725                    | -2.97 | chromatic acclimation sensor                                      | <i>Synechocystis</i> sp. PCC 6803               | <i>Cyanobacteria</i>       | 2.00E-21 |     |
| 5357                     | -2.96 | hypothetical protein HCH_06244                                    | <i>Hahella chejuensis</i> KCTC 2396             | <i>Gammaproteobacteria</i> | 8.00E-07 |     |
| 9841                     | -2.93 | mannose-6-phosphate isomerase                                     | <i>Deinococcus geothermalis</i> DSM 11300       | <i>Deinococcus-Thermus</i> | 4.00E-13 | G   |
| 16399                    | -2.92 | acetyl-CoA synthetase                                             | <i>Oceanicola batsensis</i> HTCC2597            | <i>Alphaproteobacteria</i> | 2.00E-06 | C   |
| 8467                     | -2.80 | protein of unknown function DUF323                                | <i>Haliangium ochraceum</i> DSM 14365           | <i>Deltaproteobacteria</i> | 3.00E-10 |     |
| 739                      | -2.77 | serine/threonine protein kinase                                   | <i>Haliangium ochraceum</i> DSM 14365           | <i>Deltaproteobacteria</i> | 2.00E-07 | TKL |
| 19493                    | -2.75 | Acyl-CoA dehydrogenase, C-terminal domain protein                 | <i>Alcanivorax</i> sp. DG881                    | <i>Gammaproteobacteria</i> | 3.00E-30 | I   |
| 15825                    | -2.73 | hypothetical protein VspiD_11015                                  | <i>Verrucomicrobium spinosum</i> DSM 4136       | <i>Verrucomicrobia</i>     | 4.00E-26 |     |
| 2129                     | -2.71 | tRNA-i(6)A37 thiotransferase enzyme MiaB                          | <i>Pelobacter carbinolicus</i> DSM 2380         | <i>Bacteroidetes</i>       | 4.00E-08 | J   |
| 13769                    | -2.61 | YD repeat protein                                                 | <i>Cyanothece</i> sp. PCC 7822                  | <i>Cyanobacteria</i>       | 4.00E-18 |     |

Genes in boldface were used to design PCR primers or were depicted in Fig. 2.

COG: C, Energy production and conversion; D, Cell division and chromosome partitioning; E, Amino acid transport and metabolism; F, Nucleotide transport and metabolism; G, Carbohydrate transport and metabolism; H, Coenzyme transport and metabolism; I, Lipid transport and metabolism; J, Translation, ribosomal structure and biogenesis; K, Transcription; L, Replication, recombination and repair; M, Cell envelope biogenesis, outer membrane; O, Posttranslational modification, protein turnover, chaperones; P, Inorganic ion transport and metabolism; Q, Secondary metabolites biosynthesis, transport and catabolism; R,

General function prediction only; S, Function unknown; T, Signal transduction; U, Intracellular trafficking, secretion, and vesicular transport; V, Defense mechanisms.



**Supplementary Table S5: Most significantly affected probes by the sulfamethazine treatment for the Wascana Creek**

| Probe                    | CA2   | Gene                                                                                               | Organism                                        | Phylum                     | E-value  | COG |
|--------------------------|-------|----------------------------------------------------------------------------------------------------|-------------------------------------------------|----------------------------|----------|-----|
| <i>Positive response</i> |       |                                                                                                    |                                                 |                            |          |     |
| 5271                     | -7.46 | <b>photosystem I reaction center subunit X</b>                                                     | <i>Synechococcus elongatus</i> PCC 6301         | <i>Cyanobacteria</i>       | 2.00E-07 | C   |
| 5317                     | -5.09 | conserved hypothetical protein                                                                     | <i>Arthrospira maxima</i> CS-328                | <i>Cyanobacteria</i>       | 5.00E-25 |     |
| 5263                     | -4.74 | cell shape determining protein MreB                                                                | <i>Acidobacterium capsulatum</i> ATCC 51196     | <i>Acidobacteria</i>       | 3.00E-14 | D   |
| 5345                     | -4.02 | cysteine desulfurase, SufS subfamily                                                               | <i>Nostoc azollae</i> 0708                      | <i>Cyanobacteria</i>       | 1.00E-17 | E   |
| 1293                     | -3.58 | Methylated-DNA-(protein)-cysteine S-methyltransferase DNA binding                                  | <i>Kosmotoga olearia</i> TBF 19.5.1             | <i>Thermotogae</i>         | 7.00E-07 | L   |
| 14255                    | -3.32 | hypothetical protein VspiD_21975                                                                   | <i>Verrucomicrobium spinosum</i> DSM 4136       | <i>Verrucomicrobia</i>     | 2.00E-24 |     |
| 4917                     | -3.19 | protein RecA                                                                                       | <i>Prevotella veroralis</i> F0319               | <i>Bacteroidetes</i>       | 6.00E-22 | L   |
| 14305                    | -3.15 | hypothetical protein Lcho_2013                                                                     | <i>Leptothrix cholodnii</i> SP-6                | <i>Betaproteobacteria</i>  | 7.00E-07 |     |
| 7495                     | -3.12 | nucleoside recognition domain protein                                                              | <i>Sphingobacterium spiritivorum</i> ATCC 33300 | <i>Bacteroidetes</i>       | 3.00E-52 | R   |
| 2003                     | -3.12 | Glycerophosphoryl diester phosphodiesterase                                                        | <i>Cylindrospermopsis raciborskii</i> CS-505    | <i>Cyanobacteria</i>       | 6.00E-26 | C   |
| 6765                     | -3.03 | riboflavin synthase, alpha subunit                                                                 | <i>Synechococcus</i> sp. PCC 7335               | <i>Cyanobacteria</i>       | 9.00E-10 | H   |
| 13407                    | -3.00 | dihydrolipoyllysine-residue succinyltransferase, component of 2-oxoglutarate dehydrogenase complex | <i>Pedobacter</i> sp. BAL39                     | <i>Bacteroidetes</i>       | 3.00E-40 | C   |
| 13905                    | -2.99 | Aldehyde oxidase                                                                                   | <i>Erythrobacter</i> sp. NAPI                   | <i>Alphaproteobacteria</i> | 3.00E-35 | C   |
| 5357                     | -2.96 | hypothetical protein HCH_06244                                                                     | <i>Hahella chejuensis</i> KCTC 2396             | <i>Gammaproteobacteria</i> | 8.00E-07 |     |
| 16399                    | -2.92 | acetyl-CoA synthetase                                                                              | <i>Oceanicola batsensis</i> HTCC2597            | <i>Alphaproteobacteria</i> | 2.00E-06 | C   |
| 2027                     | -2.91 | <b>DNA-directed DNA polymerase B</b>                                                               | <i>Cyanothece</i> sp. PCC 7424                  | <i>Cyanobacteria</i>       | 2.00E-12 | L   |
| 1951                     | -2.85 | heme-binding protein                                                                               | bacterium Ellin514                              | <i>Verrucomicrobia</i>     | 7.00E-06 | G   |
| 5257                     | -2.73 | phosphoesterase PA-phosphatase related protein                                                     | <i>Halothiobacillus neapolitanus</i> c2         | <i>Gammaproteobacteria</i> | 2.00E-08 | I   |
| 13707                    | -2.62 | outer membrane protein assembly complex, YaeT protein                                              | <i>Haliangium ochraceum</i> DSM 14365           | <i>Deltaproteobacteria</i> | 2.00E-44 | M   |
| 13769                    | -2.61 | YD repeat protein                                                                                  | <i>Cyanothece</i> sp. PCC 7822                  | <i>Cyanobacteria</i>       | 4.00E-18 |     |
| <i>Negative response</i> |       |                                                                                                    |                                                 |                            |          |     |
| 1911                     | 3.12  | hypothetical protein RB2654_23343                                                                  | <i>Rhodobacterales bacterium</i> HTCC2654       | <i>Alphaproteobacteria</i> | 6.00E-22 |     |
| 12157                    | 3.10  | hypothetical protein FBALC1_15992                                                                  | <i>Flavobacteriales bacterium</i> ALC-1         | <i>Bacteroidetes</i>       | 5.00E-09 |     |
| 8241                     | 2.98  | DNA protecting protein DprA                                                                        | <i>Variovorax paradoxus</i> S110                | <i>Betaproteobacteria</i>  | 5.00E-13 | LU  |
| 14253                    | 2.93  | VWA domain-containing protein                                                                      | <i>Hyphomonas neptunium</i> ATCC 15444          | <i>Alphaproteobacteria</i> | 2.00E-16 |     |

| Probe | CA2  | Gene                                                            | Organism                               | Phylum                     | E-value  | COG |
|-------|------|-----------------------------------------------------------------|----------------------------------------|----------------------------|----------|-----|
| 1077  | 2.86 | hypothetical protein                                            | <i>Curvibacter</i> sp.                 | <i>Betaproteobacteria</i>  | 7.00E-10 |     |
| 2073  | 2.72 | two-component system sensor histidine kinase/response regulator | <i>Bacteroides</i> sp. 9_1_42FAA       | <i>Bacteroidetes</i>       | 6.00E-07 | TK  |
| 17657 | 2.67 | resolvase, N-terminal                                           | <i>Dechloromonas aromatica</i> RCB     | <i>Betaproteobacteria</i>  | 3.00E-30 | L   |
| 8129  | 2.50 | hypothetical protein HNE_2611                                   | <i>Hyphomonas neptunium</i> ATCC 15444 | <i>Alphaproteobacteria</i> | 4.00E-14 |     |

Genes in boldface were used to design PCR primers or were depicted in Fig. 2.

COG: C, Energy production and conversion; D, Cell division and chromosome partitioning; E, Amino acid transport and metabolism; F, Nucleotide transport and metabolism; G, Carbohydrate transport and metabolism; H, Coenzyme transport and metabolism; I, Lipid transport and metabolism; J, Translation, ribosomal structure and biogenesis; K, Transcription; L, Replication, recombination and repair; M, Cell envelope biogenesis, outer membrane; O, Posttranslational modification, protein turnover, chaperones; P, Inorganic ion transport and metabolism; Q, Secondary metabolites biosynthesis, transport and catabolism; R, General function prediction only; S, Function unknown; T, Signal transduction; U, Intracellular trafficking, secretion, and vesicular transport; V, Defense mechanisms.

**Supplementary Table S6: Most significantly affected probes by the erythromycin treatment for the South Sackatchewan River**

| Probe           | CA1   | CA2   | Gene                                                         | Organism                                        | Phylum                     | E-value  | COG |
|-----------------|-------|-------|--------------------------------------------------------------|-------------------------------------------------|----------------------------|----------|-----|
| <i>Positive</i> |       |       |                                                              |                                                 |                            |          |     |
| 2411            | 2.91  | -0.54 | mandelate racemase/muconate lactonizing enzyme-like protein  | <i>Opitutaceae</i> bacterium TAV2               | <i>Verrucomicrobia</i>     | 4.00E-19 | M   |
| 13925           | 2.86  | -0.42 | <b>chaperone protein DnaK</b>                                | <i>Spirosoma linguale</i> DSM 74                | <i>Bacteroidetes</i>       | 1.00E-07 | O   |
| 18719           | 0.23  | -3.91 | hypothetical protein RSc1496                                 | <i>Ralstonia solanacearum</i> GMI1000           | <i>Betaproteobacteria</i>  | 2.00E-14 |     |
| 16357           | 0.10  | 3.15  | thioredoxin                                                  | <i>Sphingobacterium spiritivorum</i> ATCC 33300 | <i>Bacteroidetes</i>       | 7.00E-12 | O   |
| 12663           | -0.31 | -2.80 | Phage conserved hypothetical protein                         | <i>Comamonas testosteroni</i> CNB-2             | <i>Betaproteobacteria</i>  | 2.00E-18 |     |
| 2349            | -0.81 | -2.66 | putative twin-arginine translocation pathway signal          | <i>Flavobacteria</i> bacterium BBFL7            | <i>Bacteroidetes</i>       | 7.00E-10 | S   |
| 7007            | -1.23 | -3.10 | carboxyphosphoenolpyruvate phosphonmutase                    | uncultured crenarchaeote 31-F-01                | <i>Crenarchaeota</i>       | 3.00E-20 | G   |
| 11905           | -1.45 | -2.83 | dihydrodipicolinate synthase                                 | <i>Opitutaceae</i> bacterium TAV2               | <i>Verrucomicrobia</i>     | 1.00E-26 | EM  |
| 8909            | -1.63 | -2.94 | thiamine-monophosphate kinase, putative                      | <i>Acaryochloris marina</i> MBIC11017           | <i>Cyanobacteria</i>       | 6.00E-30 | H   |
| 19775           | -2.88 | 4.84  | protein of unknown function DUF433                           | <i>Cyanothece</i> sp. PCC 8802                  | <i>Cyanobacteria</i>       | 6.00E-23 |     |
| 3063            | -3.02 | 1.41  | Transposase (class II)                                       | <i>Synechococcus</i> sp. WH 5701                | <i>Cyanobacteria</i>       | 1.00E-19 | L   |
| 7775            | -3.16 | 0.02  | hypothetical protein MED134_14041                            | <i>Dokdonia donghaensis</i> MED134              | <i>Bacteroidetes</i>       | 2.00E-64 |     |
| <i>Negative</i> |       |       |                                                              |                                                 |                            |          |     |
| 16811           | 3.88  | 0.71  | two-component hybrid sensor and regulator                    | <i>Nostoc</i> sp. PCC 7120                      | <i>Cyanobacteria</i>       | 2.00E-07 | TKL |
| 9611            | 3.70  | 0.57  | <b>3-isopropylmalate dehydratase, large subunit</b>          | <i>Chitinophaga pinensis</i> DSM 2588           | <i>Bacteroidetes</i>       | 7.00E-25 | E   |
| 17377           | 3.30  | -2.14 | hypothetical protein TRIADDRAFT_30805                        | <i>Trichoplax adhaerens</i>                     | <i>Placozoa</i>            | 5.00E-16 |     |
| 9183            | 3.28  | -1.83 | Valyl-tRNA synthetase, class Ia                              | <i>Crocospaera watsonii</i> WH 8501             | <i>Cyanobacteria</i>       | 5.00E-43 | J   |
| 18721           | 3.25  | 0.94  | hypothetical protein Nmul_A0121                              | <i>Nitrospira multififormis</i> ATCC 25196      | <i>Nitrospirae</i>         | 8.00E-16 |     |
| 4385            | 3.15  | 0.62  | Protein kinase domain containing protein                     | <i>Brugia malayi</i>                            | <i>Nematoda</i>            | 2.00E-39 | TKL |
| 18507           | 2.99  | -0.67 | fructokinase                                                 | <i>Methanosarcina acetivorans</i> C2A           | <i>Euryarchaeota</i>       | 5.00E-16 | G   |
| 6609            | 1.93  | 3.44  | <b>RecD/TraA family helicase</b>                             | <i>Methylobacterium</i> sp. 4-46                | <i>Alphaproteobacteria</i> | 2.00E-21 | L   |
| 10833           | 1.15  | 4.75  | ATPase, P-type (transporting), HAD superfamily, subfamily IC | <i>Mycobacterium</i> sp. JLS                    | <i>Actinobacteria</i>      | 2.00E-06 |     |
| 10081           | 0.82  | -3.27 | epimerase/dehydratase                                        | <i>Streptomyces</i> sp. AA4                     | <i>Actinobacteria</i>      | 9.00E-18 |     |
| 18595           | 0.46  | 3.18  | hypothetical protein DSM3645_02153                           | <i>Blastopirellula marina</i> DSM 3645          | <i>Planctomycetes</i>      | 1.00E-15 |     |

| Probe | CA1   | CA2   | Gene                                                     | Organism                                        | Phylum                     | E-value  | COG |
|-------|-------|-------|----------------------------------------------------------|-------------------------------------------------|----------------------------|----------|-----|
| 19493 | 0.44  | 4.15  | <b>Acyl-CoA dehydrogenase, C-terminal domain protein</b> | <i>Alcanivorax</i> sp. DG881                    | <i>Gammaproteobacteria</i> | 9.00E-31 | I   |
| 5767  | 0.09  | 3.35  | hypothetical protein RB2150_01719                        | <i>Rhodobacterales</i> bacterium HTCC2150       | <i>Alphaproteobacteria</i> | 8.00E-06 |     |
| 13213 | -0.10 | 3.04  | glutamine synthetase catalytic region                    | <i>Parvibaculum lavamentivorans</i> DS-1        | <i>Alphaproteobacteria</i> | 2.00E-22 | E   |
| 16817 | -0.71 | 3.90  | GCN5-related N-acetyltransferase                         | <i>Shewanella woodyi</i> ATCC 51908             | <i>Gammaproteobacteria</i> | 4.00E-05 |     |
| 17773 | -1.22 | 3.59  | GCN5-related N-acetyltransferase                         | <i>Rhizobium leguminosarum</i> WSM1325          | <i>Alphaproteobacteria</i> | 2.00E-07 |     |
| 4505  | -1.30 | 3.06  | hypothetical protein MED134_13151                        | <i>Dokdonia donghaensis</i> MED134              | <i>Bacteroidetes</i>       | 3.00E-30 |     |
| 8121  | -2.78 | 2.01  | N-acetylmuramoyl-L-alanine amidase                       | <i>Sphingobacterium spiritivorum</i> ATCC 33861 | <i>Bacteroidetes</i>       | 3.00E-06 | M   |
| 19615 | -3.02 | -0.77 | hypothetical protein AM1_2725                            | <i>Acaryochloris marina</i> MBIC11017           | <i>Cyanobacteria</i>       | 1.00E-11 |     |
| 3545  | -3.18 | 0.95  | ATP-dependent Clp protease ATP-binding subunit ClpC      | <i>Gemmatimonas aurantiaca</i> T-27             | <i>Gemmatimonadetes</i>    | 5.00E-35 | O   |
| 18683 | -4.14 | -0.31 | hypothetical protein MAE_42380                           | <i>Microcystis aeruginosa</i> NIES-843          | <i>Cyanobacteria</i>       | 4.00E-20 |     |

Genes in boldface are similar to genes from the Wascana Creek (Table S2-S5).

COG : C, Energy production and conversion; D, Cell division and chromosome partitioning; E, Amino acid transport and metabolism; F, Nucleotide transport and metabolism; G, Carbohydrate transport and metabolism; H, Coenzyme transport and metabolism; I, Lipid transport and metabolism; J, Translation, ribosomal structure and biogenesis; K, Transcription; L, Replication, recombination and repair; M, Cell envelope biogenesis, outer membrane; O, Posttranslational modification, protein turnover, chaperones; P, Inorganic ion transport and metabolism; Q, Secondary metabolites biosynthesis, transport and catabolism; R, General function prediction only; S, Function unknown; T, Signal transduction; U, Intracellular trafficking, secretion, and vesicular transport; V, Defense mechanisms.

**Supplementary Table S7: Most significantly affected probes by the sulfamethazine treatment for the South Sackatchewan River**

| Probe           | CA1   | CA2   | Gene                                                         | Organism                                        | Phylum                     | E-value  | COG |
|-----------------|-------|-------|--------------------------------------------------------------|-------------------------------------------------|----------------------------|----------|-----|
| <i>Positive</i> |       |       |                                                              |                                                 |                            |          |     |
| 19813           | 4.40  | 1.63  | hypothetical protein                                         | <i>Trypanosoma cruzi</i> strain CL Brener       | <i>Euglenozoa</i>          | 2.00E-05 |     |
| 16811           | 3.88  | 0.71  | two-component hybrid sensor and regulator                    | <i>Nostoc</i> sp. PCC 7120                      | <i>Cyanobacteria</i>       | 2.00E-07 | TK  |
| 9611            | 3.70  | 0.57  | <b>3-isopropylmalate dehydratase, large subunit</b>          | <i>Chitinophaga pinensis</i> DSM 2588           | <i>Bacteroidetes</i>       | 7.00E-25 | E   |
| 17377           | 3.30  | -2.14 | hypothetical protein TRIADDRAFT_30805                        | <i>Trichoplax adhaerens</i>                     | <i>Placozoa</i>            | 5.00E-16 |     |
| 18721           | 3.25  | 0.94  | hypothetical protein Nmul_A0121                              | <i>Nitrospira multiformis</i> ATCC 25196        | <i>Nitrospirae</i>         | 8.00E-16 |     |
| 4385            | 3.15  | 0.62  | Protein kinase domain containing protein                     | <i>Brugia malayi</i>                            | <i>Nematoda</i>            | 2.00E-39 | TKL |
| 17233           | 2.99  | -1.06 | ArsR family transcriptional regulator                        | <i>Gemella haemolysans</i> ATCC 10379           | <i>Firmicutes</i>          | 2.00E-07 | K   |
| 18507           | 2.99  | -0.67 | fructokinase                                                 | <i>Methanosarcina acetivorans</i> C2A           | <i>Euryarchaeota</i>       | 5.00E-16 | G   |
| 4085            | 2.95  | -1.36 | hypothetical protein Cflav_PD2800                            | bacterium Ellin514                              | NA                         | 1.00E-33 |     |
| 9471            | 2.94  | -1.15 | M61 family peptidase                                         | <i>Flavobacterium psychrophilum</i> JIP02/86    | <i>Bacteroidetes</i>       | 1.00E-18 | R   |
| 6597            | 2.87  | 0.28  | nucleolar RNA-binding protein                                | <i>Leishmania major</i> strain Friedlin         | <i>Euglenozoa</i>          | 9.00E-07 | J   |
| 19153           | 2.87  | -1.76 | NUDIX hydrolase                                              | <i>Acaryochloris marina</i> MBIC11017           | <i>Cyanobacteria</i>       | 2.00E-06 | F   |
| 13925           | 2.86  | -0.42 | <b>chaperone protein DnaK</b>                                | <i>Spirosoma linguale</i> DSM 74                | <i>Bacteroidetes</i>       | 1.00E-07 | O   |
| 6609            | 1.93  | 3.44  | <b>RecD/TraA family helicase</b>                             | <i>Methylobacterium</i> sp. 4-46                | <i>Alphaproteobacteria</i> | 2.00E-21 | L   |
| 10833           | 1.15  | 4.75  | ATPase, P-type (transporting), HAD superfamily, subfamily IC | <i>Mycobacterium</i> sp. JLS                    | <i>Actinobacteria</i>      | 2.00E-06 | P   |
| 9437            | 0.67  | 3.46  | predicted protein                                            | <i>Thalassiosira pseudonana</i> CCMP1335        | <i>Bacillariophyta</i>     | 2.00E-08 |     |
| 5767            | 0.09  | 3.35  | hypothetical protein RB2150_01719                            | <i>Rhodobacterales bacterium</i> HTCC2150       | <i>Alphaproteobacteria</i> | 8.00E-06 |     |
| 16817           | -0.71 | 3.90  | GCN5-related N-acetyltransferase                             | <i>Shewanella woodyi</i> ATCC 51908             | <i>Gammaproteobacteria</i> | 4.00E-05 | R   |
| 18937           | -0.77 | -2.80 | hypothetical protein Msil_1356                               | <i>Methylocella silvestris</i> BL2              | <i>Alphaproteobacteria</i> | 2.00E-10 |     |
| 4505            | -1.30 | 3.06  | hypothetical protein MED134_13151                            | <i>Dokdonia donghaensis</i> MED134              | <i>Bacteroidetes</i>       | 3.00E-30 |     |
| 13251           | -1.60 | 2.99  | putative selenocysteine synthase                             | uncultured bacterium                            | NA                         | 7.00E-15 | E   |
| <i>Negative</i> |       |       |                                                              |                                                 |                            |          |     |
| 7011            | -0.05 | -3.91 | hypothetical protein ALOHA_HF4000APKG2J17ctg1g16             | uncultured marine microorganism HF4000_APKG2J17 | NA                         | 3.00E-09 |     |
| 3545            | -3.18 | 0.95  | ATP-dependent Clp protease ATP-binding subunit ClpC          | <i>Gemmatimonas aurantiaca</i> T-27             | <i>Gemmatimonadetes</i>    | 5.00E-35 | O   |
| 35              | -1.86 | -2.71 | <b>protein of unknown function DUF490</b>                    | <i>Chitinophaga pinensis</i> DSM 2588           | <i>Bacteroidetes</i>       | 4.00E-14 |     |
| 12663           | -0.31 | -2.80 | Phage conserved hypothetical protein                         | <i>Comamonas testosteroni</i> CNB-2             | <i>Betaproteobacteria</i>  | 2.00E-18 |     |
| 7007            | -1.23 | -3.10 | carboxyphosphoenolpyruvate phosphonmutase                    | uncultured crenarchaeote 31-F-01                | <i>Crenarchaeota</i>       | 3.00E-20 | G   |

| Probe | CA1   | CA2   | Gene                                         | Organism                                   | Phylum                     | E-value  | COG |
|-------|-------|-------|----------------------------------------------|--------------------------------------------|----------------------------|----------|-----|
| 11905 | -1.45 | -2.83 | dihydrodipicolinate synthase                 | <i>Opitutaceae</i> bacterium TAV2          | <i>Verrucomicrobia</i>     | 1.00E-26 | EM  |
| 19775 | -2.88 | 4.84  | protein of unknown function DUF433           | <i>Cyanothece</i> sp. PCC 8802             | <i>Cyanobacteria</i>       | 6.00E-23 |     |
| 3063  | -3.02 | 1.41  | Transposase (class II)                       | <i>Synechococcus</i> sp. WH 5701           | <i>Cyanobacteria</i>       | 1.00E-19 | L   |
| 7775  | -3.16 | 0.02  | hypothetical protein MED134_14041            | <i>Dokdonia donghaensis</i> MED134         | <i>Bacteroidetes</i>       | 2.00E-64 |     |
| 8909  | -1.63 | -2.94 | thiamine-monophosphate kinase, putative      | <i>Acaryochloris marina</i> MBIC11017      | <i>Cyanobacteria</i>       | 6.00E-30 | H   |
| 9095  | 0.02  | -2.76 | delta-aminolevulinic acid dehydratase        | <i>Roseiflexus</i> sp. RS-1                | <i>Chloroflexi</i>         | 7.00E-47 | H   |
| 3211  | -2.91 | -0.53 | Stage II sporulation protein E               | <i>Microcoleus chthonoplastes</i> PCC 7420 | <i>Cyanobacteria</i>       | 4.00E-58 | TK  |
| 13463 | -1.47 | -3.22 | <b>DEAD/DEAH box helicase domain protein</b> | <i>Chitinophaga pinensis</i> DSM 2588      | <i>Bacteroidetes</i>       | 1.00E-49 | LKJ |
| 18697 | -1.03 | -3.88 | SpoVR family protein                         | <i>Haliangium ochraceum</i> DSM 14365      | <i>Deltaproteobacteria</i> | 1.00E-66 | S   |

Genes in boldface are similar to genes from the Wascana Creek (Table S2-S5).

COG : C, Energy production and conversion; D, Cell division and chromosome partitioning; E, Amino acid transport and metabolism; F, Nucleotide transport and metabolism; G, Carbohydrate transport and metabolism; H, Coenzyme transport and metabolism; I, Lipid transport and metabolism; J, Translation, ribosomal structure and biogenesis; K, Transcription; L, Replication, recombination and repair; M, Cell envelope biogenesis, outer membrane; O, Posttranslational modification, protein turnover, chaperones; P, Inorganic ion transport and metabolism; Q, Secondary metabolites biosynthesis, transport and catabolism; R, General function prediction only; S, Function unknown; T, Signal transduction; U, Intracellular trafficking, secretion, and vesicular transport; V, Defense mechanisms.

**Supplementary Table S8: Most significantly affected probes by the gemfibrozil treatment for the South Sackatchewan River**

| Probe           | CA1   | CA2   | Gene                                                     | Organism                                        | Phylum                     | E-value  | COG |
|-----------------|-------|-------|----------------------------------------------------------|-------------------------------------------------|----------------------------|----------|-----|
| <i>Positive</i> |       |       |                                                          |                                                 |                            |          |     |
| 16411           | -0.32 | 3.14  | isopentenyl pyrophosphate isomerase                      | <i>Nostoc punctiforme</i> PCC 73102             | <i>Cyanobacteria</i>       | 3.00E-31 | C   |
| 4505            | -1.30 | 3.06  | hypothetical protein MED134_13151                        | <i>Dokdonia donghaensis</i> MED134              | <i>Bacteroidetes</i>       | 3.00E-30 |     |
| 8121            | -2.78 | 2.01  | N-acetylmuramoyl-L-alanine amidase                       | <i>Sphingobacterium spiritivorum</i> ATCC 33861 | <i>Bacteroidetes</i>       | 3.00E-06 | M   |
| 3545            | -3.18 | 0.95  | ATP-dependent Clp protease ATP-binding subunit ClpC      | <i>Gemmatimonas aurantiaca</i> T-27             | <i>Gemmatimonadetes</i>    | 5.00E-35 | O   |
| 9183            | 3.28  | -1.83 | Valyl-tRNA synthetase, class Ia                          | <i>Crocospaera watsonii</i> WH 8501             | <i>Cyanobacteria</i>       | 5.00E-43 | J   |
| 35              | -1.86 | -2.71 | protein of unknown function DUF490                       | <i>Chitinophaga pinensis</i> DSM 2588           | <i>Bacteroidetes</i>       | 4.00E-14 |     |
| 11905           | -1.45 | -2.83 | dihydrodipicolinate synthase                             | <i>Opitutaceae</i> bacterium TAV2               | <i>Verrucomicrobia</i>     | 1.00E-26 | EM  |
| 3827            | -0.34 | -3.08 | iojap-related protein                                    | <i>Prevotella melaninogenica</i> ATCC 25845     | <i>Bacteroidetes</i>       | 4.00E-06 | S   |
| 10081           | 0.82  | -3.27 | epimerase/dehydratase                                    | <i>Streptomyces</i> sp. AA4                     | <i>Actinobacteria</i>      | 9.00E-18 |     |
| 18719           | 0.23  | -3.91 | hypothetical protein RSc1496                             | <i>Ralstonia solanacearum</i> GMI1000           | <i>Betaproteobacteria</i>  | 2.00E-14 |     |
| <i>Negative</i> |       |       |                                                          |                                                 |                            |          |     |
| 19493           | 0.44  | 4.15  | <b>Acyl-CoA dehydrogenase, C-terminal domain protein</b> | <i>Alcanivorax</i> sp. DG881                    | <i>Gammaproteobacteria</i> | 9.00E-31 | I   |
| 6609            | 1.93  | 3.44  | <b>RecD/TraA family helicase</b>                         | <i>Methylobacterium</i> sp. 4-46                | <i>Alphaproteobacteria</i> | 2.00E-21 | L   |
| 16357           | 0.10  | 3.15  | thioredoxin                                              | <i>Sphingobacterium spiritivorum</i> ATCC 33300 | <i>Bacteroidetes</i>       | 7.00E-12 | O   |
| 13213           | -0.10 | 3.04  | glutamine synthetase catalytic region                    | <i>Parvibaculum lavamentivorans</i> DS-1        | <i>Alphaproteobacteria</i> | 2.00E-22 | E   |
| 19813           | 4.40  | 1.63  | hypothetical protein                                     | <i>Trypanosoma cruzi</i> strain CL Brener       | <i>Euglenozoa</i>          | 2.00E-05 |     |
| 6597            | 2.87  | 0.28  | nucleolar RNA-binding protein                            | <i>Leishmania major</i> strain Friedlin         | <i>Euglenozoa</i>          | 9.00E-07 | J   |
| 13755           | -2.87 | -0.18 | TPR repeat-containing protein                            | <i>Chloroherpeton thalassium</i> ATCC 35110     | <i>Chlorobi</i>            | 3.00E-22 | S   |
| 13925           | 2.86  | -0.42 | <b>chaperone protein DnaK</b>                            | <i>Spirosoma linguale</i> DSM 74                | <i>Bacteroidetes</i>       | 1.00E-07 | O   |
| 19935           | 2.89  | -0.97 | hypothetical protein Rru_A2454                           | <i>Rhodospirillum rubrum</i> ATCC 11170         | <i>Alphaproteobacteria</i> | 5.00E-20 |     |
| 17233           | 2.99  | -1.06 | ArsR family transcriptional regulator                    | <i>Gemella haemolysans</i> ATCC 10379           | <i>Firmicutes</i>          | 2.00E-07 | K   |
| 8341            | 3.14  | -1.61 | polysaccharide polymerase                                | <i>Sorangium cellulosum</i> 'So ce 56'          | <i>Deltaproteobacteria</i> | 3.00E-08 | M   |
| 12663           | -0.31 | -2.80 | Phage conserved hypothetical protein                     | <i>Comamonas testosteroni</i> CNB-2             | <i>Betaproteobacteria</i>  | 2.00E-18 |     |
| 7007            | -1.23 | -3.10 | carboxyphosphoenolpyruvate phosphonmutase                | uncultured crenarchaeote 31-F-01                | <i>Crenarchaeota</i>       | 3.00E-20 | G   |

Genes in boldface are similar to genes from the Wascana Creek (Table S2-S5).

COG : C, Energy production and conversion; D, Cell division and chromosome partitioning; E, Amino acid transport and metabolism; F, Nucleotide transport and metabolism; G, Carbohydrate transport and metabolism; H, Coenzyme transport and metabolism; I, Lipid transport and metabolism; J, Translation,

ribosomal structure and biogenesis; K, Transcription; L, Replication, recombination and repair; M, Cell envelope biogenesis, outer membrane; O, Posttranslational modification, protein turnover, chaperones; P, Inorganic ion transport and metabolism; Q, Secondary metabolites biosynthesis, transport and catabolism; R, General function prediction only; S, Function unknown; T, Signal transduction; U, Intracellular trafficking, secretion, and vesicular transport; V, Defense mechanisms.



**Supplementary Table S9: Most significantly affected probes by the sulfamethoxazole treatment for the South Sackatchewan River**

| Probe    | CA1   | CA2   | Gene                                                | Organism                                                     | Phylum                     | E-value  | COG |
|----------|-------|-------|-----------------------------------------------------|--------------------------------------------------------------|----------------------------|----------|-----|
| Positive |       |       |                                                     |                                                              |                            |          |     |
| 13213    | -0.10 | 3.04  | glutamine synthetase catalytic region               | <i>Parvibaculum lavamentivorans</i> DS-1                     | <i>Alphaproteobacteria</i> | 2.00E-22 | E   |
| 9095     | 0.02  | -2.76 | delta-aminolevulinic acid dehydratase               | <i>Roseiflexus</i> sp. RS-1                                  | <i>Chloroflexi</i>         | 7.00E-47 | H   |
| 12663    | -0.31 | -2.80 | Phage conserved hypothetical protein                | <i>Comamonas testosteroni</i> CNB-2                          | <i>Betaproteobacteria</i>  | 2.00E-18 |     |
| 3827     | -0.34 | -3.08 | iojap-related protein                               | <i>Prevotella melaninogenica</i> ATCC 25845                  | <i>Bacteroidetes</i>       | 4.00E-06 | S   |
| 8121     | -2.78 | 2.01  | N-acetylmuramoyl-L-alanine amidase                  | <i>Sphingobacterium spiritivorum</i> ATCC 33861              | <i>Bacteroidetes</i>       | 3.00E-06 | M   |
| 9183     | 3.28  | -1.83 | Valyl-tRNA synthetase, class Ia                     | <i>Crocospaera watsonii</i> WH 8501                          | <i>Cyanobacteria</i>       | 5.00E-43 | J   |
| 10081    | 0.82  | -3.27 | epimerase/dehydratase                               | <i>Streptomyces</i> sp. AA4                                  | <i>Actinobacteria</i>      | 9.00E-18 |     |
| 7011     | -0.05 | -3.91 | hypothetical protein ALOHA_HF4000APKG2J17ctg1g16    | uncultured marine microorganism HF4000_APKG2J17              | NA                         | 3.00E-09 |     |
| 8341     | 3.14  | -1.61 | polysaccharide polymerase                           | <i>Sorangium cellulosum</i> 'So ce 56'                       | <i>Deltaproteobacteria</i> | 3.00E-08 | M   |
| 10047    | 4.57  | -0.43 | <b>conserved hypothetical protein</b>               | <i>Arthrospira maxima</i> CS-328                             | <i>Cyanobacteria</i>       | 6.00E-13 |     |
| 15039    | 4.02  | -0.59 | membrane lipoprotein lipid attachment site          | <i>Polynucleobacter necessarius</i> subsp. necessarius STIR1 | <i>Betaproteobacteria</i>  | 3.00E-10 | R   |
| 18683    | -4.14 | -0.31 | hypothetical protein MAE_42380                      | <i>Microcystis aeruginosa</i> NIES-843                       | <i>Cyanobacteria</i>       | 4.00E-20 |     |
| 19935    | 2.89  | -0.97 | hypothetical protein Rru_A2454                      | <i>Rhodospirillum rubrum</i> ATCC 11170                      | <i>Alphaproteobacteria</i> | 5.00E-20 |     |
| 4085     | 2.95  | -1.36 | hypothetical protein Cflav_PD2800                   | bacterium Ellin514                                           | NA                         | 1.00E-33 |     |
| 4385     | 3.15  | 0.62  | Protein kinase domain containing protein            | <i>Brugia malayi</i>                                         | <i>Nematoda</i>            | 2.00E-39 | TKL |
| 17377    | 3.30  | -2.14 | hypothetical protein TRIADDRAFT_30805               | <i>Trichoplax adhaerens</i>                                  | <i>Placozoa</i>            | 5.00E-16 |     |
| 18507    | 2.99  | -0.67 | fructokinase                                        | <i>Methanosarcina acetivorans</i> C2A                        | <i>Euryarchaeota</i>       | 5.00E-16 | G   |
| 7007     | -1.23 | -3.10 | carboxyphosphoenolpyruvate phosphonmutase           | uncultured crenarchaeote 31-F-01                             | <i>Crenarchaeota</i>       | 3.00E-20 | G   |
| negative |       |       |                                                     |                                                              |                            |          |     |
| 9437     | 0.67  | 3.46  | predicted protein                                   | <i>Thalassiosira pseudonana</i> CCMP1335                     | <i>Bacillariophyta</i>     | 2.00E-08 |     |
| 16817    | -0.71 | 3.90  | GCN5-related N-acetyltransferase                    | <i>Shewanella woodyi</i> ATCC 51908                          | <i>Gammaproteobacteria</i> | 4.00E-05 | R   |
| 4505     | -1.30 | 3.06  | hypothetical protein MED134_13151                   | <i>Dokdonia donghaensis</i> MED134                           | <i>Bacteroidetes</i>       | 3.00E-30 |     |
| 3545     | -3.18 | 0.95  | ATP-dependent Clp protease ATP-binding subunit ClpC | <i>Gemmatimonas aurantiaca</i> T-27                          | <i>Gemmatimonadetes</i>    | 5.00E-35 | O   |
| 11905    | -1.45 | -2.83 | dihydrodipicolinate synthase                        | <i>Opitutaceae</i> bacterium TAV2                            | <i>Verrucomicrobia</i>     | 1.00E-26 | EM  |
| 18719    | 0.23  | -3.91 | hypothetical protein RSc1496                        | <i>Ralstonia solanacearum</i> GMI1000                        | <i>Betaproteobacteria</i>  | 2.00E-14 |     |
| 19775    | -2.88 | 4.84  | protein of unknown function DUF433                  | <i>Cyanothece</i> sp. PCC 8802                               | <i>Cyanobacteria</i>       | 6.00E-23 |     |
| 16411    | -0.32 | 3.14  | isopentenyl pyrophosphate isomerase                 | <i>Nostoc punctiforme</i> PCC 73102                          | <i>Cyanobacteria</i>       | 3.00E-31 | C   |

| Probe | CA1   | CA2   | Gene                                                        | Organism                                                               | Phylum                     | E-value  | COG |
|-------|-------|-------|-------------------------------------------------------------|------------------------------------------------------------------------|----------------------------|----------|-----|
| 5767  | 0.09  | 3.35  | hypothetical protein RB2150_01719                           | <i>Rhodobacterales</i> bacterium HTCC2150                              | <i>Alphaproteobacteria</i> | 8.00E-06 |     |
| 6609  | 1.93  | 3.44  | <b>RecD/TraA family helicase</b>                            | <i>Methylobacterium</i> sp. 4-46                                       | <i>Alphaproteobacteria</i> | 2.00E-21 | L   |
| 10833 | 1.15  | 4.75  | ATPase, P-type (transporting),<br>superfamily, subfamily IC | HAD <i>Mycobacterium</i> sp. JLS                                       | <i>Actinobacteria</i>      | 2.00E-06 | P   |
| 16357 | 0.10  | 3.15  | thioredoxin                                                 | <i>Sphingobacterium spiritivorum</i> ATCC 33300                        | <i>Bacteroidetes</i>       | 7.00E-12 | O   |
| 13559 | -2.73 | 1.87  | N-acetyl-gamma-glutamyl-phosphate<br>reductase              | <i>Curvibacter</i> putative symbiont of Hydra<br><i>magnipapillata</i> | <i>Betaproteobacteria</i>  | 3.00E-17 | E   |
| 13755 | -2.87 | -0.18 | TPR repeat-containing protein                               | <i>Chloroherpeton thalassium</i> ATCC 35110                            | <i>Chlorobi</i>            | 3.00E-22 | S   |
| 18773 | 3.01  | 0.52  | GUN4-like                                                   | <i>Crocospaera watsonii</i> WH 8501                                    | <i>Cyanobacteria</i>       | 3.00E-09 | TKL |
| 17773 | -1.22 | 3.59  | GCN5-related N-acetyltransferase                            | <i>Rhizobium leguminosarum</i> bv. trifolii<br>WSM1325                 | <i>Alphaproteobacteria</i> | 2.00E-07 | R   |

Genes in boldface are similar to genes from the Wascana Creek (Table S2-S5).

COG : C, Energy production and conversion; D, Cell division and chromosome partitioning; E, Amino acid transport and metabolism; F, Nucleotide transport and metabolism; G, Carbohydrate transport and metabolism; H, Coenzyme transport and metabolism; I, Lipid transport and metabolism; J, Translation, ribosomal structure and biogenesis; K, Transcription; L, Replication, recombination and repair; M, Cell envelope biogenesis, outer membrane; O, Posttranslational modification, protein turnover, chaperones; P, Inorganic ion transport and metabolism; Q, Secondary metabolites biosynthesis, transport and catabolism; R, General function prediction only; S, Function unknown; T, Signal transduction; U, Intracellular trafficking, secretion, and vesicular transport; V, Defense mechanisms.
